# Supplementary material for: Inactivation of Polymicrobial Biofilms of Foodborne Pathogens Using Epsilon Poly-L-Lysin Conjugated Chitosan Nanoparticles
Source: MDPI journal article supplement (doi:10.3390/foods11040569), 2022-02-16
Supplement: s1 [file s1]

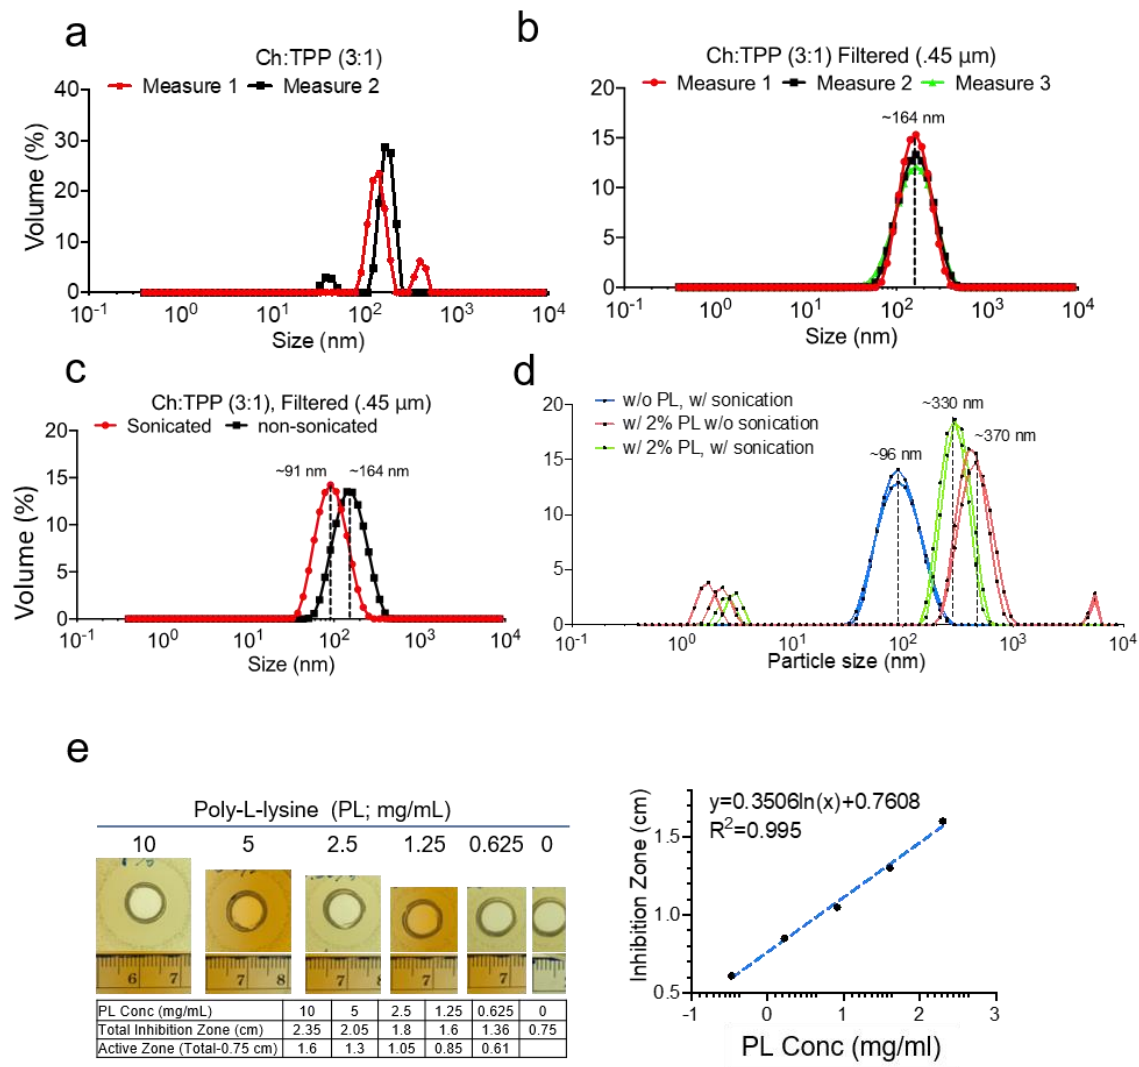

**Supplementary Figure S1.** Synthesis and characterization of chitosan nanoparticles (ChNP) and chitosan nanoparticles with  $\epsilon$ -poly-L-Lysine (ChNP-PL). (a) Zetasizer measurement of ChNP synthesized with sodium tripolyphosphate TPP (Ch:TPP 3:1). Zetasizer measurement of ChNP after filtration through 0.45  $\mu$ m syringe filters (b) and after 10 cycles of 30s sonication (c). (d) Zetasizer measurement of ChNP-PL synthesized with 2% PL with or without sonication. (e) Estimation of binding of PL to ChNP based on the inhibitory effect of different concentrations of free PL on *L. monocytogenes* lawn compared to ChNP-PL conjugate on BHI agar plates (See Figure 1b).

Bai et al. 2022. Inactivation of Polymicrobial Biofilms of Foodborne Pathogens Using Epsilon Poly-L-Lysin Conjugated Chitosan Nanoparticles

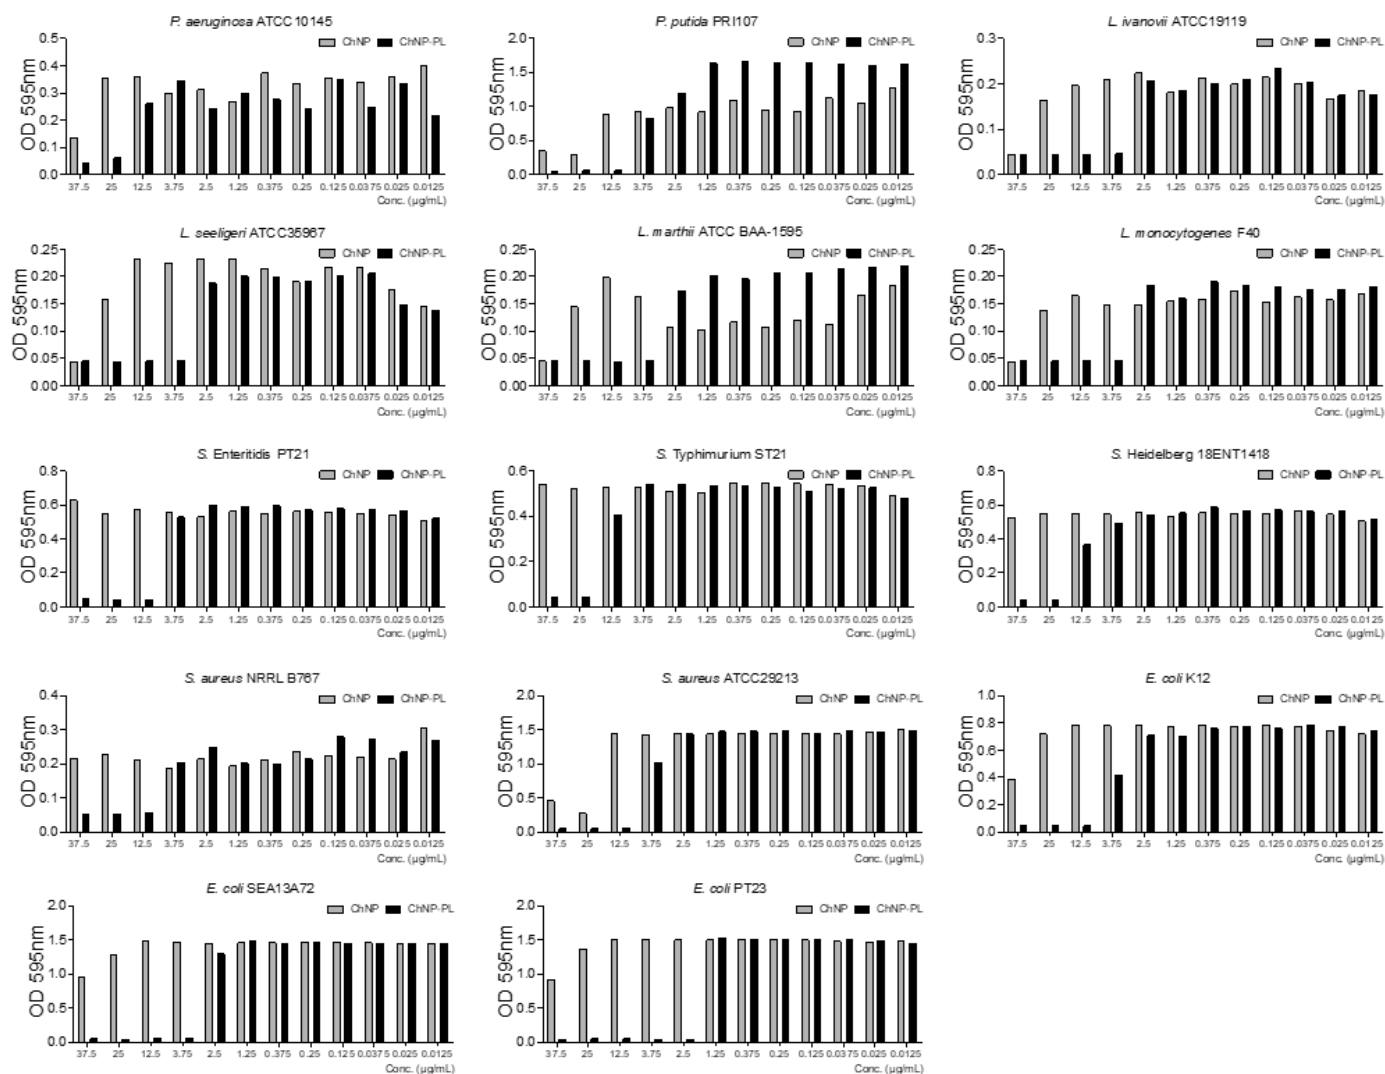

**Supplementary Figure S2.** Analysis of minimum inhibitory concentrations (MICs) of ChNP and ChNP-PL on 19 strains of *L. monocytogenes*, *S. aureus*, *P. aeruginosa*, *S. enterica*, and *E. coli*.
